# Supplementary material for: The interaction between SPARC and GRP78 interferes with ER stress signaling and potentiates apoptosis via PERK/eIF2α and IRE1α/XBP-1 in colorectal cancer
Source: PubMed Central journal article supplement (PMC6594974; doi:10.1038/s41419-019-1687-x), 2019-06-26
Supplement: 41419_2019_1687_MOESM1_ESM.pdf [file 41419_2019_1687_MOESM1_ESM.pdf]

**Supplementary Figure 1. Tunicamycin (TM)- and CPT-11-induced ER stress and apoptosis in CRC cells overexpressing SPARC.** (A) HCT116 were treated with CPT-11 (50 $\mu$ M, 12h) followed by cell fractionation, co-IP and Western blot analysis of Cyt, Mem and Nuc fractions. Calnexin and DNA-PK served as quality control of cell fractionation. (B) ATF4 induction in HCT116 cells treated with CPT-11 (50 $\mu$ M) and MIP/SP cells treated to 1 $\mu$ g/ml TM were examined by Western blot analysis. (C) Western blot analysis of CHOP induction in CPT-11-treated MIP/SP cells. GRP78 expression confirms persistent ER stress in MIP/SP cells exposed to CPT-11. Apoptosis and Autophagy markers were examined in MIP/Zeo and MIP/SP under (D) TM (1 $\mu$ g/ml) or (E) CPT-11 (50 $\mu$ M) treatment. (F) MIP/Zeo and MIP/SP cells were treated with CPT-11 (50 $\mu$ M, 12 h) and the cell lysates were immunoprecipitated with anti-GRP78 and anti-PERK antibodies, respectively, followed by Western blot analysis.

# Supplementary Data Figure 2

**A**

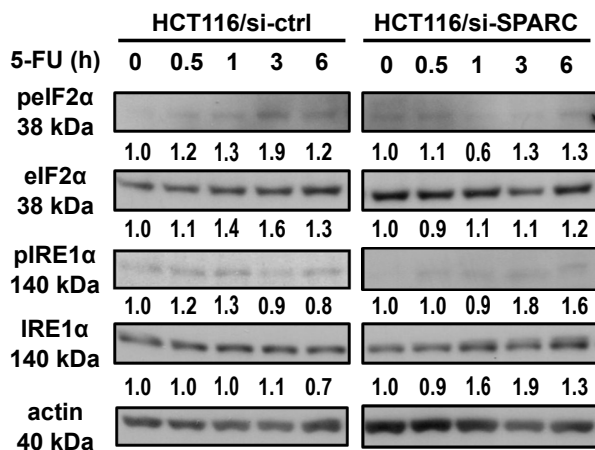

**B**

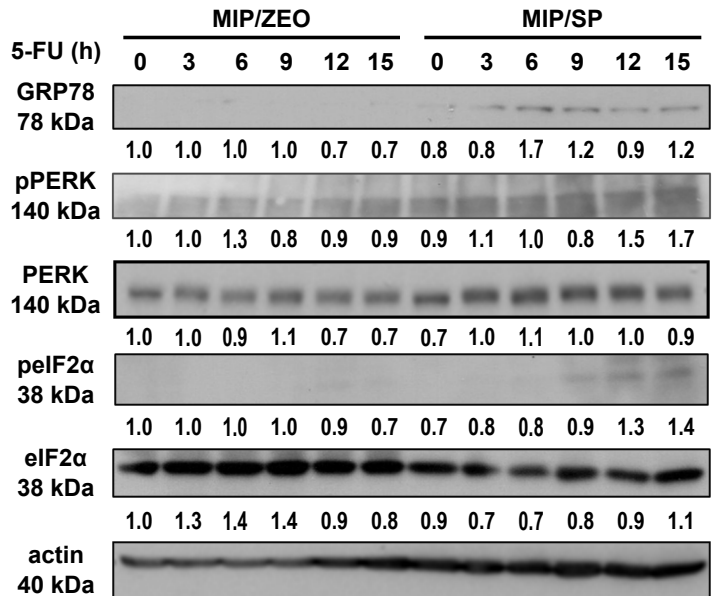

**C**

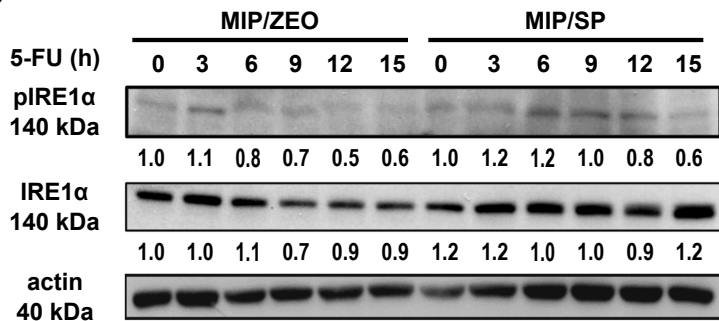

**D**

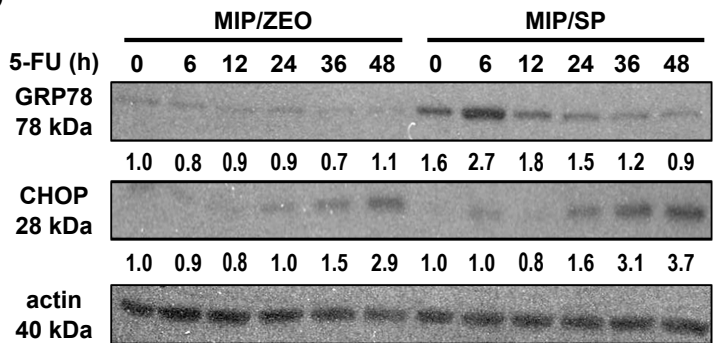

**E**

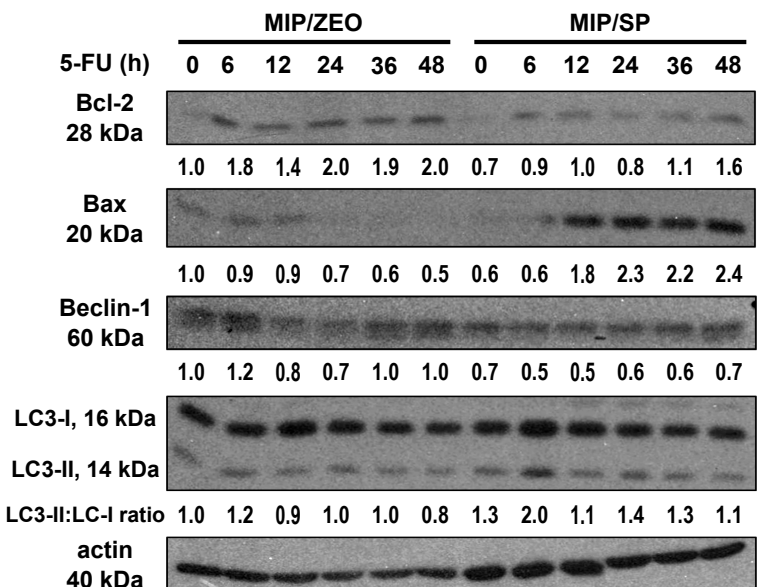

**Supplementary Figure 2. 5-FU-induced ER stress and apoptosis in HCT116 and MIP/SP. (A)**

Western blot analysis showing activation of ER stress signaling in HCT116 cells following SPARC siRNA knockdown and subsequent exposure to 5-FU (25 $\mu$ M). Activation of (B) PERK/eIF2 $\alpha$  and (C) IRE1 $\alpha$ /XBP-1 signaling in MIP/Zeo and MIP/SP treated with 5-FU (25 $\mu$ M) were examined by Western blot analysis. (D) CHOP induction and (E) expression of apoptosis and autophagy markers were examined in 5-FU-treated MIP/Zeo and MIP/SP cells by Western blot analysis.
